# Supplementary material for: The Cyclic Imine Core Common to the Marine Macrocyclic Toxins Is Sufficient to Dictate Nicotinic Acetylcholine Receptor Antagonism
Source: MDPI journal article supplement (doi:10.3390/md22040149), 2024-03-27
Supplement: s1 [file s1]

## *Supplementary Material*

# **The Cyclic Imine Core Common to the Marine Macrocyclic Toxins Is Sufficient to Dictate Nicotinic Acetylcholine Receptor Antagonism**

**Yves Bourne <sup>1</sup>, Gerlind Sulzenbacher <sup>1</sup>, Laurent Chabaud <sup>2†</sup>, Rómulo Aráoz <sup>3</sup>, Zoran Radić <sup>4</sup>, Sandrine Conrod <sup>5‡</sup>, Palmer Taylor <sup>4</sup>, Catherine Guillou <sup>2</sup>, Jordi Molgó <sup>3</sup>, Pascale Marchot <sup>1,5,\*</sup>**

<sup>1</sup> Lab “Architecture et Fonction des Macromolécules Biologiques” (AFMB), Aix-Marseille Univ, CNRS, Faculté des Sciences Campus Luminy, 13288 Marseille cedex 09, France; yves.bourne@univ-amu.fr (Y.B.); gerlind.sulzenbacher@univ-amu.fr (G.S.)

<sup>2</sup> Institut de Chimie des Substances Naturelles (ICSN), Univ Paris-Saclay, CNRS, 91198 Gif-sur-Yvette, France; catherine.guillou@cnrs.fr

<sup>3</sup> Service d’Ingénierie Moléculaire pour la Santé (SIMoS) EMR CNRS 9004, Département Médicaments et Technologies pour la Santé, Institut des Sciences du Vivant Frédéric Joliot, CEA, INRAE, Université Paris-Saclay, 91191 Gif-sur-Yvette, France; romulo.araoz@cea.fr (R.A.); jordi.molgo@cea.fr (J.M.)

<sup>4</sup> Skaggs School of Pharmacy and Pharmaceutical Sciences (SSPPS), University of California San Diego, La Jolla, CA, 92093-0751, USA; zradic@health.ucsd.edu (Z.R.); pwtaylor@health.ucsd.edu (P.T.)

<sup>5</sup> Centre de Recherche en Neurobiologie et Neurophysiologie de Marseille (CRN2M), Aix Marseille Univ, CNRS, 13344 Marseille, France

<sup>†</sup> Current address: Institut des Sciences Moléculaires (ISM), Univ Bordeaux, CNRS, Bordeaux INP, 33400 Talence, France; laurent.chabaud@u-bordeaux.fr

<sup>‡</sup> Current address: CEREGE, Aix-Marseille Univ, CNRS, IRD, Collège de France, INRAE, 13545 Aix-en-Provence, France; conrod@cerege.fr

\* Correspondence: pascale.marchot@univ-amu.fr

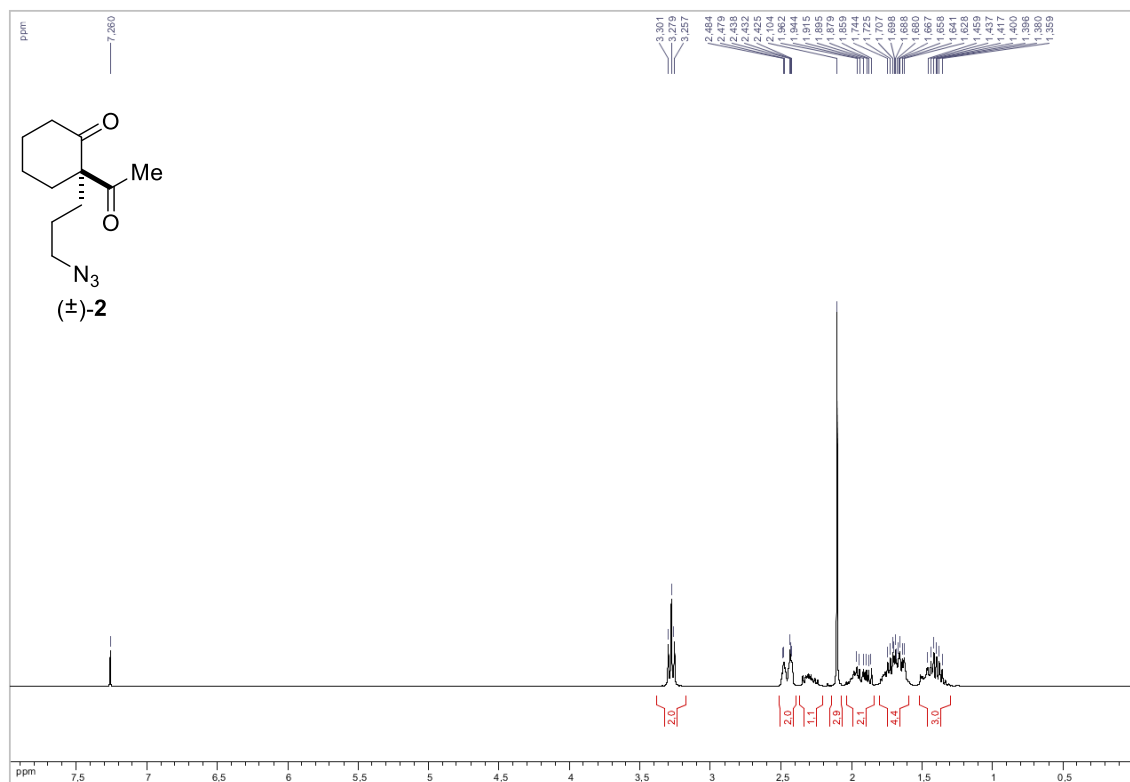

Figure S1. <sup>1</sup>H NMR spectrum (CDCl<sub>3</sub>) of 2-acetyl-2-(3-azidopropyl)cyclohexanone (±)-2.

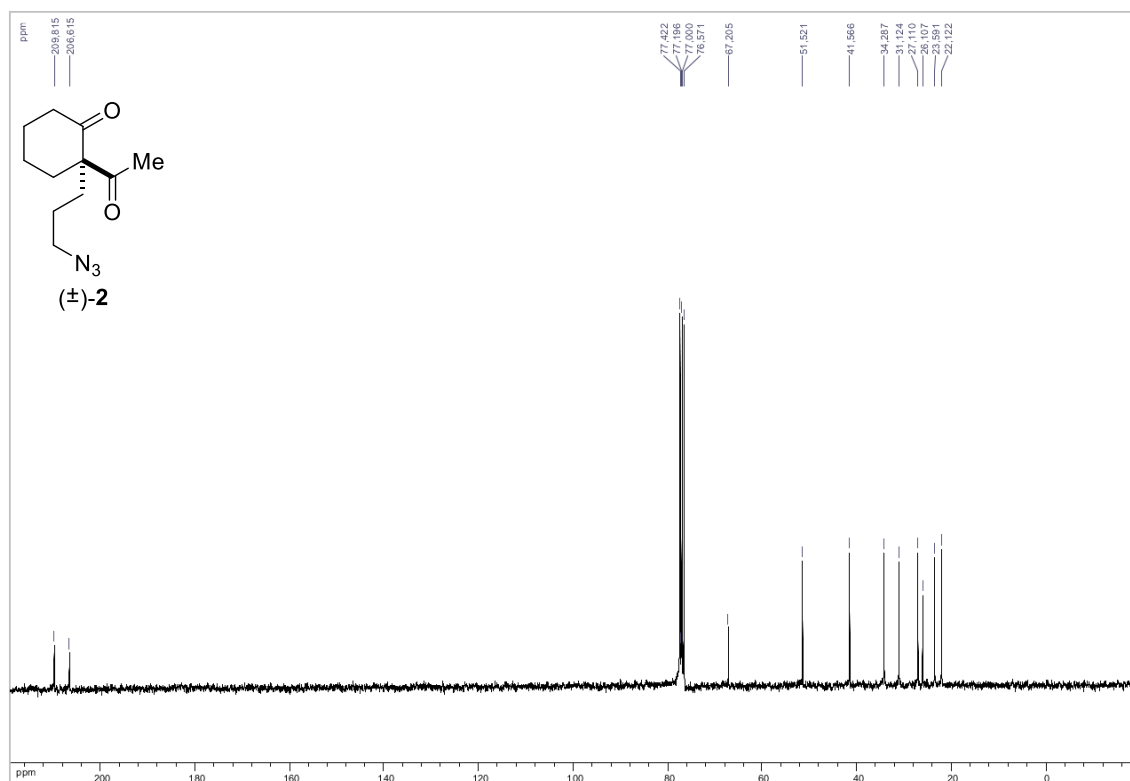

Figure S2. <sup>13</sup>C NMR spectrum (CDCl<sub>3</sub>) of 2-acetyl-2-(3-azidopropyl)cyclohexanone (±)-2.

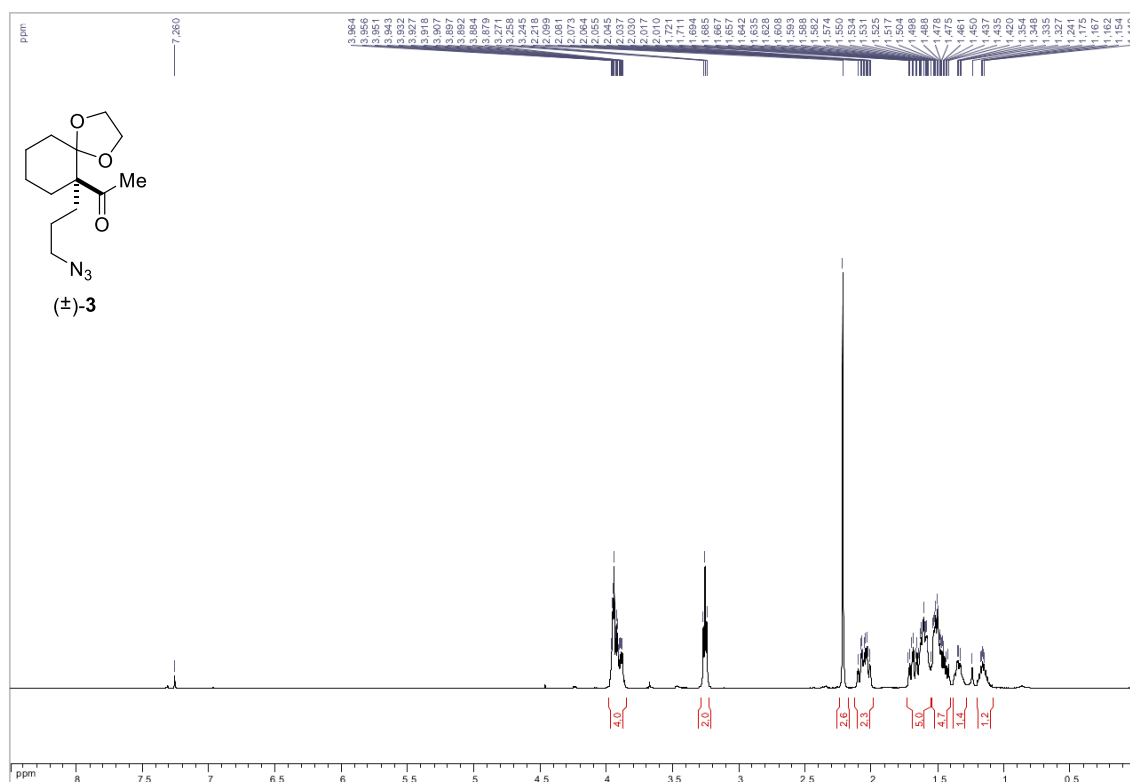

**Figure S3.**  $^1\text{H}$  NMR spectrum ( $\text{CDCl}_3$ ) of 1-[6-(3-azidopropyl)-1,4-dioxaspiro[4.5]dec-6-yl]ethanone (±)-3.

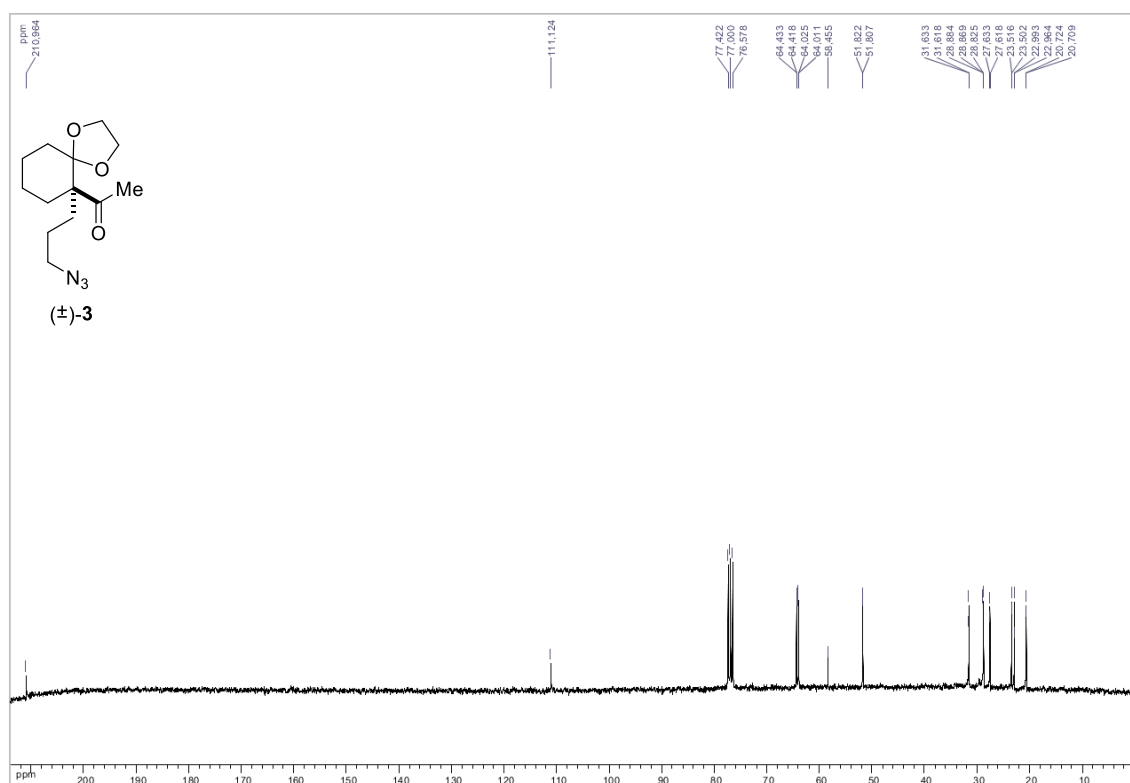

**Figure S4.**  $^{13}\text{C}$  NMR spectrum ( $\text{CDCl}_3$ ) of 1-[6-(3-azidopropyl)-1,4-dioxaspiro[4.5]dec-6-yl]ethanone (±)-3.

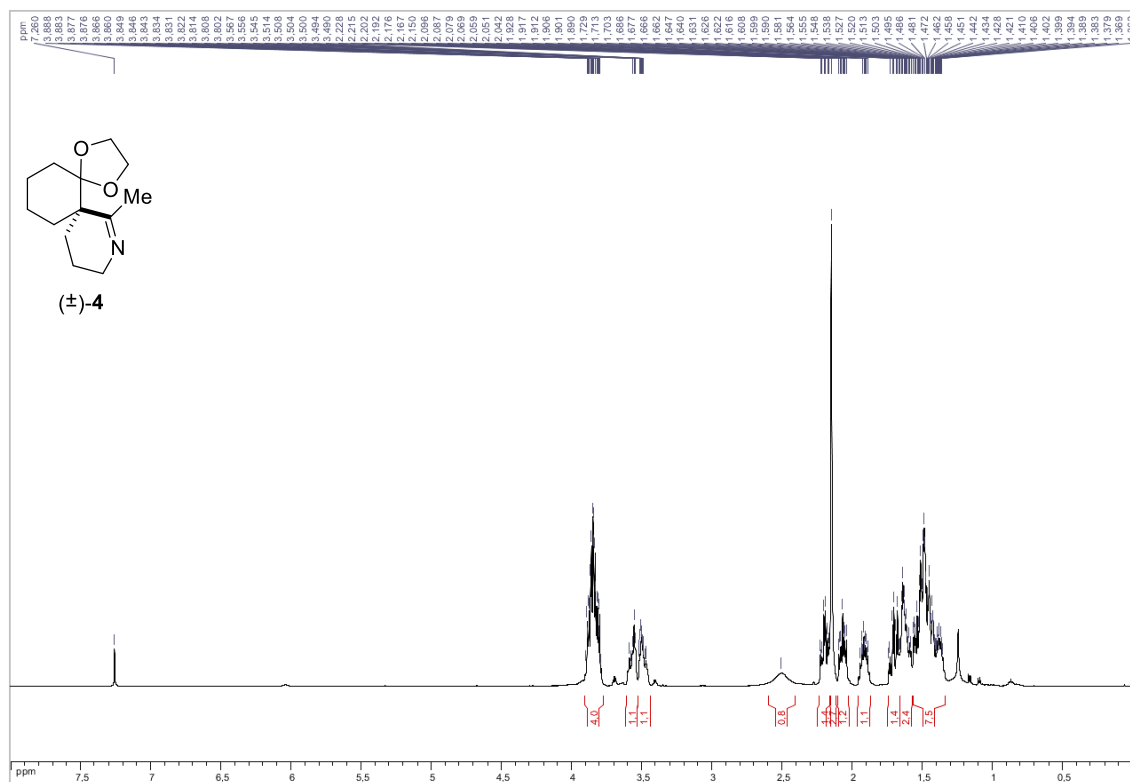

**Figure S5.** <sup>1</sup>H NMR spectrum (CDCl<sub>3</sub>) of 7-methyl-1,4-dioxo-8-azadispiro[4.0.5.4]pentadec-7-ene (±)-4.

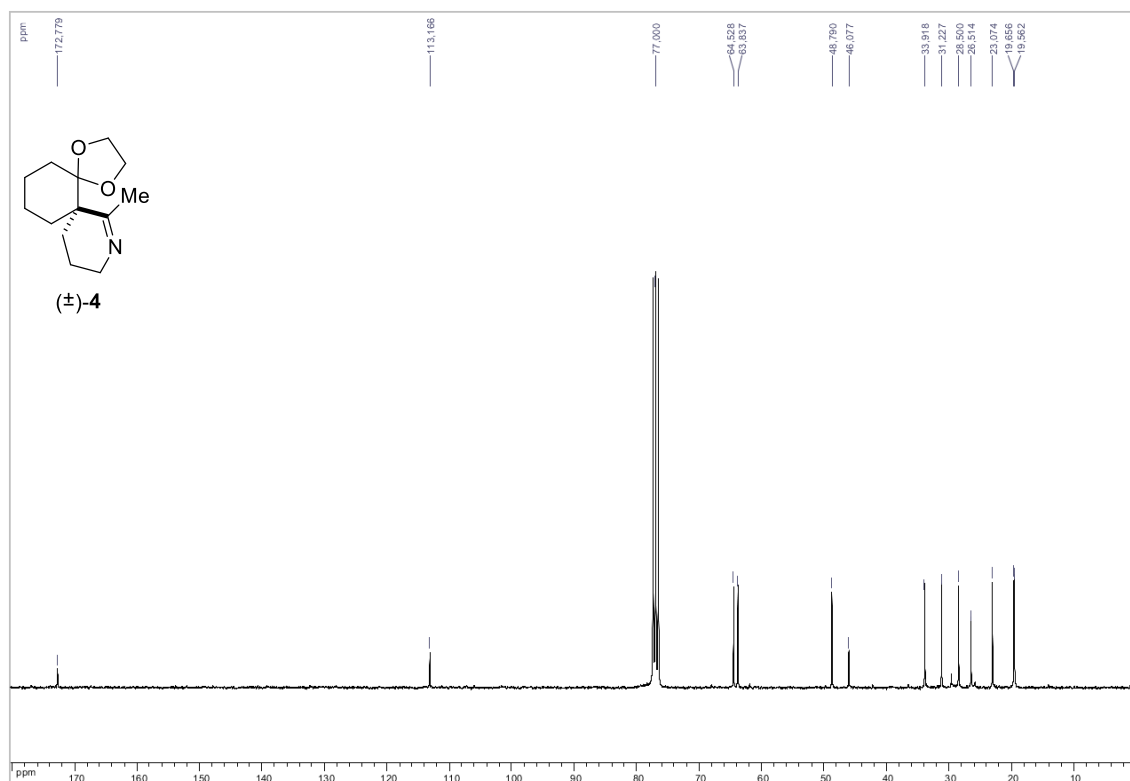

**Figure S6.** <sup>13</sup>C NMR spectrum (CDCl<sub>3</sub>) of 7-methyl-1,4-dioxo-8-azadispiro[4.0.5.4]pentadec-7-ene (±)-4.

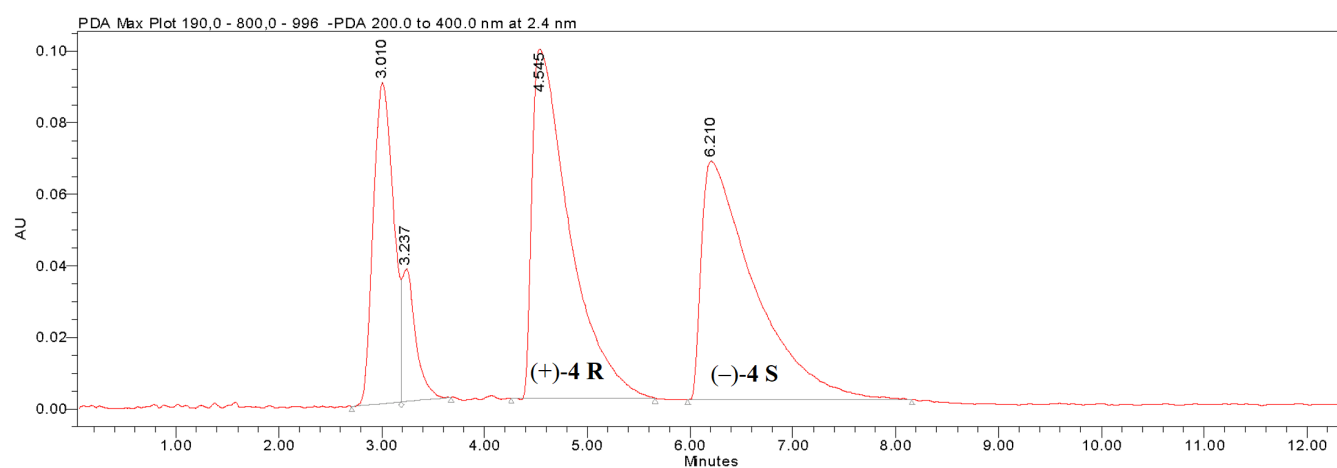

**Figure S7.** Separation of enantiomers (+)-4 and (-)-4 from the (±)-4 racemate using chiral HPLC (Chiralcel® OD 10  $\mu$ m 4.6x250 mm column, Hept/EtOH 80:20 (v/v), flow 1 mL/min).

**Table S1.** X-ray crystallography - Data collection and refinement statistics.

|                                                                  | Spiroimine (+)-4 R                            | Spiroimine (−)-4 S                            | Racemic (±)-4                                 |
|------------------------------------------------------------------|-----------------------------------------------|-----------------------------------------------|-----------------------------------------------|
| Beamline                                                         | ESRF ID14-EH1                                 | SOLEIL Proxima-1                              | ESRF ID23-1                                   |
| <b>Data collection</b>                                           |                                               |                                               |                                               |
| Space group                                                      | P2 <sub>1</sub> 2 <sub>1</sub> 2 <sub>1</sub> | P2 <sub>1</sub> 2 <sub>1</sub> 2 <sub>1</sub> | P2 <sub>1</sub> 2 <sub>1</sub> 2 <sub>1</sub> |
| Cell dimensions <i>a</i> , <i>b</i> , <i>c</i> (Å)               | 87.98, 115, 129.96                            | 88.34, 116.03, 131.04                         | 75.79, 123.63, 131.1                          |
| Resolution <sup>a</sup> (Å)                                      | 48.13-2.00 (2.04-2.00)                        | 48.49-1.85 (1.88-1.85)                        | 65-2.10 (2.15-2.10)                           |
| No. reflections                                                  | 89606 (4509)                                  | 109510 (5565)                                 | 72272 (4374)                                  |
| CC (1/2)                                                         | 0.999 (0.699)                                 | 1.0 (0.618)                                   | 0.993 (0.687)                                 |
| <i>R</i> <sub>meas</sub> <sup>b</sup>                            | 0.087 (0.959)                                 | 0.050 (0.954)                                 | 0.128 (0.720)                                 |
| <i>I</i> / $\sigma$ <i>I</i>                                     | 15.5 (1.8)                                    | 22.2 (1.7)                                    | 8.7 (2.1)                                     |
| Completeness (%)                                                 | 100 (99.9)                                    | 94.9 (98.3)                                   | 99.7 (100)                                    |
| Redundancy                                                       | 6.2 (6.2)                                     | 7.0 (4.4)                                     | 3.5 (2.6)                                     |
| Wilson B (Å <sup>2</sup> )                                       | 23.85                                         | 32.22                                         | 21.85                                         |
| <b>Refinement</b>                                                |                                               |                                               |                                               |
| Resolution (Å)                                                   | 48.18-2.00 (2.052-2.00)                       | 47.97-1.85 (1.88-1.85)                        | 65-2.1 (2.15-2.1)                             |
| No. reflections working set                                      | 84991 (6197)                                  | 103900 (7900)                                 | 70046 (5108)                                  |
| No. reflections test set                                         | 4537 (317)                                    | 5509 (434)                                    | 2180 (148)                                    |
| <i>R</i> <sub>work</sub> / <i>R</i> <sub>free</sub> <sup>c</sup> | 0.1712/0.2060                                 | 0.1820/0.2114                                 | 0.18/0.21                                     |
| No. atoms                                                        |                                               |                                               |                                               |
| Protein + N-glycans                                              | 8457                                          | 8440                                          | 8560                                          |
| Ligands/Ions                                                     | 85                                            | 90                                            | 80                                            |
| Water                                                            | 784                                           | 706                                           | 520                                           |
| B-factors                                                        |                                               |                                               |                                               |
| Protein + N-glycans, main/side                                   | 32.92/38.29                                   | 38.67/43.39                                   | 33.7/38.5                                     |
| Ligands/Ions                                                     | 40                                            | 66.83                                         | -                                             |
| Water                                                            | 37.38                                         | 42.06                                         | 36.4                                          |
| R.m.s. deviations <sup>d</sup>                                   |                                               |                                               |                                               |
| Bond lengths (Å)                                                 | 0.008                                         | 0.008                                         | 0.007                                         |
| Bond angles (°)                                                  | 1.472                                         | 1.447                                         | 1.271                                         |
| Ramachandran                                                     |                                               |                                               |                                               |
| Favoured (%)                                                     | 98.94                                         | 99.04                                         | 98.5                                          |
| Allowed (%)                                                      | 1.06                                          | 0.96                                          | 1.5                                           |
| Disallowed (%)                                                   | 0                                             | 0                                             | 0                                             |
| PDB accession code                                               | 8Q1M                                          | 8QTL                                          | 8QX2                                          |

<sup>a</sup> Values in parentheses are those for the highest-resolution shell. <sup>b</sup>  $R_{meas} = \frac{\sum_i \sum_h (n_h / (n_h - 1))^{1/2} |I_{hi} - \langle I_h \rangle|}{\sum_h \sum_i \langle I_h \rangle}$ , where *I* is an individual reflection measurement and  $\langle I \rangle$  is the mean intensity for symmetry-related reflections. <sup>c</sup>  $R_{work} = \frac{\sum_{hkl} ||F_o(hkl)| - |F_c||}{\sum_{hkl} |F_o(hkl)|}$ , where *F<sub>o</sub>* and *F<sub>c</sub>* are observed and calculated structure factors, respectively. *R<sub>free</sub>* is calculated for 5% of randomly selected reflections excluded from refinement. <sup>d</sup> Root-mean-square deviation from ideal values.

**Table S2.** Geometric parameters of key interactions between the (+)-4 **R** and (−)-4 **S** enantiomers and side chains in the A-AChBP binding pocket.

| Subunit interface | Spiroimine (+)-4 <b>R</b>                    |                                       |                                                    | Spiroimine (−)-4 <b>S</b>                    |                                   |                                                       |
|-------------------|----------------------------------------------|---------------------------------------|----------------------------------------------------|----------------------------------------------|-----------------------------------|-------------------------------------------------------|
|                   | Type of interaction                          |                                       |                                                    | Type of interaction                          |                                   |                                                       |
|                   | H-bonds*                                     | $\pi$ - $\pi$ stacking                | van der Waals**                                    | H-bonds*                                     | $\pi$ - $\pi$ stacking            | van der Waals**                                       |
| A-B               | N3-W147<br>carbonyl oxygen<br>2.6 Å / 140.7° | Cyclic imine-<br>W147<br>face-to-face | Y93, Y188,<br>C190, Y195<br><i>Y55, I118, S167</i> | N3-W147<br>carbonyl oxygen<br>2.9 Å / 123.8° | Cyclic imine-<br>W147<br>T-shaped | Y93, Y188,<br>C190, C191,<br>Y195<br><i>Y55, I118</i> |
| B-C               | N3-W147<br>carbonyl oxygen<br>2.7 Å / 144.2° | Cyclic imine-<br>W147<br>face-to-face | Y93, Y188,<br>C190, Y195<br><i>Y55, I118</i>       | N3-W147<br>carbonyl oxygen<br>3.5 Å / 121.2° | Cyclic imine-<br>W147<br>T-shaped | Y93, Y188,<br>C190, C191,<br>Y195<br><i>Y55, I118</i> |
| C-D               | N3-W147<br>carbonyl oxygen<br>2.7 Å / 142°   | Cyclic imine-<br>W147<br>face-to-face | Y93, Y188,<br>C190, Y195<br><i>Y55, I118</i>       | N3-W147<br>carbonyl oxygen<br>2.8 Å / 125.3° | Cyclic imine-<br>W147<br>T-shaped | Y93, Y188,<br>C190, C191,<br>Y195<br><i>Y55, I118</i> |
| D-E               | N3-W147<br>carbonyl oxygen<br>2.7 Å / 144.4° | Cyclic imine-<br>W147<br>face-to-face | Y93, Y188,<br>C190, Y195<br><i>Y55, I118</i>       | N3-W147<br>carbonyl oxygen<br>3.0 Å / 126.9° | Cyclic imine-<br>W147<br>T-shaped | Y93, Y188,<br>C190, C191,<br>Y195<br><i>Y55, I118</i> |
| E-A               | N3-W147<br>carbonyl oxygen<br>2.7 Å / 142.1° | Cyclic imine-<br>W147<br>face-to-face | Y93, Y188,<br>C190, Y195<br><i>Y55, I118</i>       | N3-W147<br>carbonyl oxygen<br>2.9 Å / 125.6° | Cyclic imine-<br>W147<br>T-shaped | Y93, Y188,<br>C190, C191,<br>Y195<br><i>Y55, I118</i> |

\*The angle value refers to the  $\hat{H}$  angle between the hydrogen bond donor, acceptor and acceptor antecedent.

\*\*Non-italicized A-AChBP residues Y93, Y188, C190, C191, Y195 belong to the principal, (+) face of the subunit interface, while italicized residues *Y55, I118, S167* belong to the complementary, (−) face of the interface (Figure A1).

----- End of Suppl. Mat. -----
